# Supplementary material
Source: MDPI journal article supplement (https://www.mdpi.com/2071-1050/13/20/11184)
Supplement: s1 [file s1]

Archive with 3 entries (3 files):
- File S1. Interview guide.pdf
- File S2. Faculty and staff survey.pdf
- File S3. Student survey.pdf
