# Supplementary material
Source: MDPI journal article supplement (https://www.mdpi.com/2071-1050/13/20/11184)
Supplement: s1 [file s1]

## Part 1: Institutional Level

Does your university have an official institutional internationalization strategy?

- What are the main aims behind it?
- How does it look like in practice? (institutional level, faculty, academic support staff, student level)
- How is the overall strategy/individual parts evaluated (quantitatively, qualitatively)?

## Part 2: Faculty & Staff Level

Do you think that faculty and staff are aware and work towards internationalization aims?

Thinking of the intercultural competence (note: explain intercultural) of faculty and staff:

- Do you offer opportunities for ICC development (courses, workshops, exchanges)?
- Do you encourage them? How?
- Do you think these opportunities are well-received by faculty and staff?
- How satisfied are you with faculty and staff participation in such activities?
- What could be the main obstacles for staff not participating in such activities? How do you address these?
- Does staff diversity play a role in hiring decisions?

Connecting faculty/staff ICC to students:

- Do you think cultural aspects/ICC development is considered in curriculum design? Are there differences in different programs/schools?
- How do faculty members support students' ICC development? (e.g., showing diverse perspectives in literature, draw on diverse student perspectives, encourage intercultural interactions, measures to prevent marginalization)
- Who is responsible to make sure students develop ICC (all/certain staff members/students)?

## Part 3: Student Level

Do you offer/encourage international mobility for students?

- How satisfied are you with student participation (both inbound and outbound)?
- What works well/can be improved?
- What are obstacles to student mobility, and how do you address these?

Thinking about internationalization on campus:

- What curricular offers for ICC learning do you have? (Examples could be specific courses/integration in courses/informal learning outcomes; physically or virtually).
  - o How are these received by students?
  - o How well do you think they support ICC development?
  - o How could they be improved/what are the obstacles?
- What co-curricular offers for ICC learning do you have? Examples could be seminars, workshops, guest speakers presenting issues from a different perspective or culture/ICC-related topics)?
  - o How are these received by students?
  - o How well do you think they support ICC development?
  - o How could they be improved/what are the obstacles?
- What extra-curricular offers for ICC learning do you have? Examples could be campus events, student associations, clubs)?
  - o How are these received by students?
  - o How well do you think they support ICC development?
  - o How could they be improved/what are the obstacles?

- How are intercultural interactions encouraged on campus (different student groups/students and community?)
- How satisfied are you with internationalization on campus efforts for ICC development?
- What works well/can be improved?
- What are obstacles to on-campus ICC development, and how do you address these?

#### Part 1: Institutional Level

Does your university have an official institutional internationalization strategy?

What are the main aims behind it?

How does it look like in practice? (institutional level, faculty, academic support staff, student level)

How is the overall strategy/individual parts evaluated (quantitatively, qualitatively)?

#### Part 2: Faculty & Staff Level

Do you think that faculty and staff are aware and work towards internationalization aims?

Thinking of the intercultural competence (note: explain intercultural) of faculty and staff:

Do you offer opportunities for ICC development (courses, workshops, exchanges)?

Do you encourage them? How?

Do you think these opportunities are well-received by faculty and staff?

How satisfied are you with faculty and staff participation in such activities?

What could be the main obstacles for staff not participating in such activities? How do you address these?

Does staff diversity play a role in hiring decisions?

Connecting faculty/staff ICC to students:

Do you think cultural aspects/ICC development is considered in curriculum design? Are there differences in different programs/schools?

How do faculty members support students' ICC development? (e.g., showing diverse perspectives in literature, draw on diverse student perspectives, encourage intercultural interactions, measures to prevent marginalization)

Who is responsible to make sure students develop ICC (all/certain staff members/students)?

#### Part 3: Student Level

Do you offer/encourage international mobility for students?

How satisfied are you with student participation (both inbound and outbound)?

What works well/can be improved?

What are obstacles to student mobility, and how do you address these?

Thinking about internationalization on campus:

What curricular offers for ICC learning do you have? (Examples could be specific courses/integration in courses/informal learning outcomes; physically or virtually).

How are these received by students?

How well do you think they support ICC development?

How could they be improved/what are the obstacles?

What co-curricular offers for ICC learning do you have? Examples could be seminars, workshops, guest speakers presenting issues from a different perspective or culture/ICC-related topics)?

How are these received by students?

How well do you think they support ICC development?

How could they be improved/what are the obstacles?

What extra-curricular offers for ICC learning do you have? Examples could be campus events, student associations, clubs)?

How are these received by students?

How well do you think they support ICC development?

How could they be improved/what are the obstacles?

How are intercultural interactions encouraged on campus (different student groups/students and community?)

How satisfied are you with internationalization on campus efforts for ICC development?

What works well/can be improved?

What are obstacles to on-campus ICC development, and how do you address these?
