# Supplementary material
Source: MDPI journal article supplement (https://www.mdpi.com/2071-1050/13/20/11184)
Supplement: s1 [file s1]

1. What is your main occupational duty \*

*Mark only one oval.*

☐ Teaching/Education

☐ Research

☐ Administration

☐ Other: \_\_\_\_\_

2. How many years have you worked within Higher Educational Institutions? \*

\_\_\_\_\_

3. I am currently working in: \*

*Mark only one oval.*

☐ Spain

☐ Italy

☐ Sweden

☐ France

☐ Hungary

☐ Other: \_\_\_\_\_

4. What is your gender? \*

*Mark only one oval.*

☐ Female

☐ Male

☐ Prefer not to say

☐ Other: \_\_\_\_\_

5. At your current institution, are you a locally or internationally recruited staff member? \*

*Mark only one oval.*

- ☐ I am a local staff member (i.e., native or long-term resident in the country)
- ☐ I am an internationally recruited staff member (i.e., non-native or recently relocated from another country)
- ☐ Other: \_\_\_\_\_

6. Did you ever participate in the following international experiences: \*

*Tick all that apply.*

- ☐ International exchange(s) as student
- ☐ International presentations/conferences
- ☐ International guest lectures or workshops
- ☐ International professional development/competence-building events
- ☐ International research projects
- ☐ International job shadowing or observation periods
- ☐ International mobility (short term, up to 2 months)
- ☐ International mobility (long term, more than 2 months)
- ☐ None of the above

Other: ☐ \_\_\_\_\_

7. Are you planning to participate in the following international experiences: \*

*Tick all that apply.*

- ☐ International presentations/conferences
- ☐ International guest lectures or workshops
- ☐ International professional development/competence-building events
- ☐ International research projects
- ☐ International job shadowing or observation periods
- ☐ International mobility (short term, up to 2 months)
- ☐ International mobility (long term, more than 2 months)
- ☐ None of the above

Other: ☐ \_\_\_\_\_

- ☐ Actively encourage international experiences for staff
- ☐ Offer flexibility with work duties for staff interested in international experiences
- ☐ Offer financial support for international experiences
- ☐ Actively encourage international mobility for staff
- ☐ Offer preparatory courses/workshops/seminars for staff interested in international mobility
- ☐ Consider international experiences in hiring/career advancement decisions
- ☐ None of the above
- ☐ Not sure/don't know

Other: ☐ \_\_\_\_\_

9. (Potential) benefits of international mobility: Which importance would the following considerations have for your decision to go abroad: \*

*Mark only one oval per row.*

|                                                     | Very high<br>importance | High<br>importance    | Moderate<br>importance | Low<br>importance     | Very low<br>importance | Don't<br>know/no<br>opinion |
|-----------------------------------------------------|-------------------------|-----------------------|------------------------|-----------------------|------------------------|-----------------------------|
| Self-/competence<br>development                     | <input type="radio"/>   | <input type="radio"/> | <input type="radio"/>  | <input type="radio"/> | <input type="radio"/>  | <input type="radio"/>       |
| Travel and<br>adventure                             | <input type="radio"/>   | <input type="radio"/> | <input type="radio"/>  | <input type="radio"/> | <input type="radio"/>  | <input type="radio"/>       |
| Improve language<br>skills                          | <input type="radio"/>   | <input type="radio"/> | <input type="radio"/>  | <input type="radio"/> | <input type="radio"/>  | <input type="radio"/>       |
| Learn about other<br>cultures                       | <input type="radio"/>   | <input type="radio"/> | <input type="radio"/>  | <input type="radio"/> | <input type="radio"/>  | <input type="radio"/>       |
| Learn about work<br>processes in<br>other countries | <input type="radio"/>   | <input type="radio"/> | <input type="radio"/>  | <input type="radio"/> | <input type="radio"/>  | <input type="radio"/>       |
| Professional<br>development                         | <input type="radio"/>   | <input type="radio"/> | <input type="radio"/>  | <input type="radio"/> | <input type="radio"/>  | <input type="radio"/>       |
| Career<br>advancement                               | <input type="radio"/>   | <input type="radio"/> | <input type="radio"/>  | <input type="radio"/> | <input type="radio"/>  | <input type="radio"/>       |
| Other ((please<br>specify below))                   | <input type="radio"/>   | <input type="radio"/> | <input type="radio"/>  | <input type="radio"/> | <input type="radio"/>  | <input type="radio"/>       |

10. If you clicked "other" before, please specify

---

11. (Potential) obstacles of international mobility: Which importance would the following considerations have for your decision to (not) go abroad: \*

*Mark only one oval per row.*

|                                     | Very high<br>importance | High<br>importance    | Moderate<br>importance | Low<br>importance     | Very low<br>importance | Don't<br>know/no<br>opinion |
|-------------------------------------|-------------------------|-----------------------|------------------------|-----------------------|------------------------|-----------------------------|
| Difficult timing                    | <input type="radio"/>   | <input type="radio"/> | <input type="radio"/>  | <input type="radio"/> | <input type="radio"/>  | <input type="radio"/>       |
| Financial considerations            | <input type="radio"/>   | <input type="radio"/> | <input type="radio"/>  | <input type="radio"/> | <input type="radio"/>  | <input type="radio"/>       |
| Other obligations<br>(work/family)  | <input type="radio"/>   | <input type="radio"/> | <input type="radio"/>  | <input type="radio"/> | <input type="radio"/>  | <input type="radio"/>       |
| Not relevant for my<br>position     | <input type="radio"/>   | <input type="radio"/> | <input type="radio"/>  | <input type="radio"/> | <input type="radio"/>  | <input type="radio"/>       |
| Not relevant for my<br>field        | <input type="radio"/>   | <input type="radio"/> | <input type="radio"/>  | <input type="radio"/> | <input type="radio"/>  | <input type="radio"/>       |
| Lack of<br>institutional<br>support | <input type="radio"/>   | <input type="radio"/> | <input type="radio"/>  | <input type="radio"/> | <input type="radio"/>  | <input type="radio"/>       |
| Other (please<br>specify below)     | <input type="radio"/>   | <input type="radio"/> | <input type="radio"/>  | <input type="radio"/> | <input type="radio"/>  | <input type="radio"/>       |

12. If you clicked "other" before, please specify:

---

13. Where there any other factors affecting your decision to go abroad or not (positively or negatively)?

---

---

---

---

---

14. What could home universities do to improve the experience of staff wanting to go abroad?

---

---

---

---

---

15. What could host universities do to improve the experience of visiting staff?

---

---

---

---

---

---
