# Supplementary material
Source: MDPI journal article supplement (https://www.mdpi.com/2071-1050/13/20/11184)
Supplement: s1 [file s1 › File S3. Student survey.pdf]

1. I am currently, or was previously, studying in: \*

*Mark only one oval.*

- ☐ Spain
- ☐ Italy
- ☐ Sweden
- ☐ France
- ☐ Hungary
- ☐ Other: \_\_\_\_\_

2. What is your gender \*

*Mark only one oval.*

- ☐ Female
- ☐ Male
- ☐ Prefer not to say
- ☐ Other: \_\_\_\_\_

3. Did you participate in international mobility (studies or internship abroad)? \*

*Mark only one oval.*

- ☐ Yes      *Skip to question 4*
- ☐ No, but I am planning to      *Skip to question 14*
- ☐ No, and I am not planning to      *Skip to question 19*

Before you went abroad

4. Did you receive information about your host country's culture from your home university? \*

*Mark only one oval.*

- ☐ Yes
- ☐ No
- ☐ I don't know/remember.

5. Which factors affected your decision to go abroad: \*

*Tick all that apply.*

- ☐ Self-/competence development
- ☐ Travel and adventure
- ☐ Learn more about other cultures
- ☐ Career considerations
- ☐ Improve language skills

Other: ☐ \_\_\_\_\_

6. Did your home university: \*

*Tick all that apply.*

- ☐ Actively encourage international mobility
- ☐ Have mandatory international mobility
- ☐ Offer preparatory courses/workshops/seminars for students interested in international mobility
- ☐ Offer financial support for international mobility
- ☐ None of the above
- ☐ Not sure/don't know

Other: ☐ \_\_\_\_\_

7. What could universities do to improve the experience of students wanting to go abroad? \*

---

---

---

---

---

Once you were abroad

8. Did your host university offer: \*

*Mark only one oval per row.*

|                                                               | Yes, and I participated | Yes, but I didn't participate | No                    | I don't know/remember |
|---------------------------------------------------------------|-------------------------|-------------------------------|-----------------------|-----------------------|
| A "welcome event" for new international students              | <input type="radio"/>   | <input type="radio"/>         | <input type="radio"/> | <input type="radio"/> |
| Training/workshops/seminars about intercultural communication | <input type="radio"/>   | <input type="radio"/>         | <input type="radio"/> | <input type="radio"/> |
| A specific course about intercultural communication           | <input type="radio"/>   | <input type="radio"/>         | <input type="radio"/> | <input type="radio"/> |
| Intercultural competence as part of another course            | <input type="radio"/>   | <input type="radio"/>         | <input type="radio"/> | <input type="radio"/> |
| Support services for international students                   | <input type="radio"/>   | <input type="radio"/>         | <input type="radio"/> | <input type="radio"/> |

9. Thinking about your classes at the host university, how common was it that: \*

*Mark only one oval per row.*

|                                                                     | Very uncommon         | Uncommon              | Common                | Very common           | I don't know/remember. |
|---------------------------------------------------------------------|-----------------------|-----------------------|-----------------------|-----------------------|------------------------|
| Teachers encouraged interactions among diverse students.            | <input type="radio"/>  |
| Teachers mixed local and international students for group work.     | <input type="radio"/>  |
| Teachers valued different students' perspectives.                   | <input type="radio"/>  |
| Teachers were flexible and supportive if students had difficulties. | <input type="radio"/>  |
| Teachers valued all students without discrimination.                | <input type="radio"/>  |
| Teachers intervened if there were disagreements or discrimination.  | <input type="radio"/>  |
|                                                                     | <input type="radio"/>  |

10. Thinking about your social life in the host country, how common was it that you interacted with: \*

*Mark only one oval per row.*

|                                                | Very uncommon         | Uncommon              | Common                | Very common           | Don't know/remember   |
|------------------------------------------------|-----------------------|-----------------------|-----------------------|-----------------------|-----------------------|
| International students from your home country. | <input type="radio"/> |
| Other international students.                  | <input type="radio"/> |
| Local students.                                | <input type="radio"/> |
| Other locals.                                  | <input type="radio"/> |

11. Which contexts made it easy to get to know others on a meaningful level: \*

*Tick all that apply.*

- ☐ (University) housing
- ☐ Welcome events by the university
- ☐ Mentor/buddy program
- ☐ Courses
- ☐ Campus events
- ☐ Student unions/associations/clubs/meetups
- ☐ Other associations/clubs/meetups
- ☐ Volunteering
- ☐ Internship/colleagues

Other: ☐ \_\_\_\_\_

12. What could host universities do to improve the experience of international students? \*

---

---

---

---

---

*Skip to question 13*

### After your time abroad

13. To what degree do you agree with the following statements \*

*Mark only one oval per row.*

|                                                   | Totally agree         | Agree                 | Neutral               | Disagree              | Totally disagree      | Don't know/no opinion |
|---------------------------------------------------|-----------------------|-----------------------|-----------------------|-----------------------|-----------------------|-----------------------|
| It was easy readjusting to my home university     | <input type="radio"/> |
| I got academic use of the things I learned abroad | <input type="radio"/> |
| I got social use of the things I learned abroad   | <input type="radio"/> |
| I have kept in touch with people I met abroad     | <input type="radio"/> |
| I am happy that I went abroad                     | <input type="radio"/> |

If you are planning to go abroad:

14. Did/Will you receive information about your potential host country's culture from your home university? \*

*Mark only one oval.*

- ☐ Yes
- ☐ No
- ☐ Not sure/don't know

15. Which factors are affecting your decision to go abroad: \*

*Tick all that apply.*

- ☐ Self-/competence development
- ☐ Travel and adventure
- ☐ Learn more about other cultures
- ☐ Career considerations
- ☐ Improve language skills
- ☐ Mandatory study abroad period

Other: ☐ \_\_\_\_\_

16. To your knowledge, does your home university: \*

*Tick all that apply.*

- ☐ Actively encourage international mobility
- ☐ Have mandatory international mobility
- ☐ Offer preparatory courses/workshops/seminars for students interested in international mobility
- ☐ Offer financial support for international mobility
- ☐ None of the above
- ☐ Not sure/don't know

Other: ☐ \_\_\_\_\_

17. Which factors might negatively affect your decision to go abroad: \*

*Tick all that apply.*

- ☐ Difficult timing.
- ☐ (Mis)match of study/course plans
- ☐ Financial considerations
- ☐ Other obligations (work/family)
- ☐ Not relevant for me or my field

Other: ☐ \_\_\_\_\_

18. What could universities do to improve the experience of students wanting to go abroad? \*

---

---

---

---

---

If you are not planning to go abroad

19. Did you ever consider going abroad? \*

*Mark only one oval.*

- ☐ Yes, but other things took priority.
- ☐ No, I was never seriously interested.

20. How important were the following factors led to your decision to not go abroad: \*

*Mark only one oval per row.*

|                                      | Not<br>important      | Somewhat<br>Important | Very<br>important     | N/A                   |
|--------------------------------------|-----------------------|-----------------------|-----------------------|-----------------------|
| Difficult timing.                    | <input type="radio"/> | <input type="radio"/> | <input type="radio"/> | <input type="radio"/> |
| ((Mis))match of study/course plans   | <input type="radio"/> | <input type="radio"/> | <input type="radio"/> | <input type="radio"/> |
| Financial considerations             | <input type="radio"/> | <input type="radio"/> | <input type="radio"/> | <input type="radio"/> |
| Other obligations<br>((work/family)) | <input type="radio"/> | <input type="radio"/> | <input type="radio"/> | <input type="radio"/> |
| Not relevant for me or my field      | <input type="radio"/> | <input type="radio"/> | <input type="radio"/> | <input type="radio"/> |

21. Where there any other factors affecting your decision?

---

---

---

---

---

22. To your knowledge, does your home university: \*

*Tick all that apply.*

- ☐ Actively encourage international mobility
- ☐ Offer preparatory courses/workshops/seminars for students interested in international mobility
- ☐ Offer financial support for international mobility
- ☐ None of the above
- ☐ Not sure/don't know

23. What could universities do to improve the experience of students considering to go abroad?

---

---

---

---

---

24. What could your university have done to make studies abroad more appealing for you?

---

---

---

---

---

---
